# Supplementary material for: Study on the short-term effects of increased alcohol and cigarette consumption in healthy young men’s seminal quality
Source: PubMed Central journal article supplement (PMC5377370; doi:10.1038/srep45457), 2017-04-03
Supplement: srep45457-s1.pdf [file srep45457-s1.pdf]

**Longitudinal study on the short-term effects of increased alcohol and cigarette consumption in young men's seminal quality**

Joana Vieira Silva<sup>1+</sup>, Daniel Cruz<sup>1+</sup>, Mariana Gomes<sup>1+</sup>, Bárbara Regadas Correia<sup>1</sup>, Maria João Freitas<sup>1</sup>, Luís Sousa<sup>1</sup>, Vladimiro Silva<sup>2</sup>, Margarida Fardilha<sup>1\*</sup>

<sup>1</sup> Laboratory of Signal Transduction, Department of Medical Sciences, Institute of Biomedicine – iBiMED, University of Aveiro, Campus Universitário de Santiago, 3810-193, Aveiro, Portugal

<sup>2</sup> Ferticentro – Center for Fertility Studies, Praceta Prof. Robalo Cordeiro (Idealmed), Circular Externa de Coimbra, 3020-479 Coimbra, Portugal

+ These authors contributed equally to this work

\* Corresponding author: Margarida Fardilha, Departamento de Ciências Médicas, Agra do Crasto, Campus de Santiago, Universidade de Aveiro, 3810-193 Aveiro, Portugal. T: +351-918143947. E: [mfardilha@ua.pt](mailto:mfardilha@ua.pt)

Supplementary Table S1. Paired difference tests between the study time-points (TPs).

|                                  | N  | Paired Samples | p value (2-tailed) | Effect size Cohen'd |
|----------------------------------|----|----------------|--------------------|---------------------|
| Sexual abstinence                | 32 | TP1 vs TP2     | 0.88 <sup>a</sup>  | 0.0                 |
|                                  |    | TP1 vs TP3     | 0.25 <sup>a</sup>  | 0.3                 |
|                                  |    | TP2 vs TP3     | 0.29 <sup>a</sup>  | 0.3                 |
| Volume                           | 36 | TP1 vs TP2     | 0.02 <sup>a</sup>  | 0.4                 |
|                                  |    | TP1 vs TP3     | 0.00 <sup>a</sup>  | 0.8                 |
|                                  |    | TP2 vs TP3     | 0.04 <sup>a</sup>  | 0.3                 |
| Concentration                    | 36 | TP1 vs TP2     | 0.21 <sup>a</sup>  | 0.2                 |
|                                  |    | TP1 vs TP3     | 0.04 <sup>a</sup>  | 0.3                 |
|                                  |    | TP2 vs TP3     | 0.57 <sup>a</sup>  | 0.1                 |
| Total number of spermatozoa      | 36 | TP1 vs TP2     | 0.05 <sup>a</sup>  | 0.3                 |
|                                  |    | TP1 vs TP3     | 0.00 <sup>a</sup>  | 0.8                 |
|                                  |    | TP2 vs TP3     | 0.10 <sup>a</sup>  | 0.3                 |
| Progressive motility             | 36 | TP1 vs TP2     | 0.01 <sup>a</sup>  | 0.4                 |
|                                  |    | TP1 vs TP3     | 0.07 <sup>a</sup>  | 0.4                 |
|                                  |    | TP2 vs TP3     | 0.52 <sup>a</sup>  | 0.1                 |
| Non-progressive motility         | 36 | TP1 vs TP2     | 0.04 <sup>a</sup>  | 0.5                 |
|                                  |    | TP1 vs TP3     | 0.002 <sup>a</sup> | 0.8                 |
|                                  |    | TP2 vs TP3     | 0.54 <sup>a</sup>  | 0.1                 |
| Immotile                         | 36 | TP1 vs TP2     | 0.05 <sup>a</sup>  | 0.3                 |
|                                  |    | TP1 vs TP3     | 0.77 <sup>a</sup>  | 0.1                 |
|                                  |    | TP2 vs TP3     | 0.21 <sup>a</sup>  | 0.2                 |
| Normal morphology                | 36 | TP1 vs TP2     | 0.00 <sup>a</sup>  | 0.4                 |
|                                  |    | TP1 vs TP3     | 0.00 <sup>a</sup>  | 0.5                 |
|                                  |    | TP2 vs TP3     | 1.00 <sup>a</sup>  | 0.0                 |
| Head defects                     | 36 | TP1 vs TP2     | 0.00 <sup>a</sup>  | 0.6                 |
|                                  |    | TP1 vs TP3     | 0.22 <sup>a</sup>  | 0.1                 |
|                                  |    | TP2 vs TP3     | 0.001 <sup>a</sup> | 0.5                 |
| Midpiece defects                 | 36 | TP1 vs TP2     | 0.00 <sup>a</sup>  | 0.6                 |
|                                  |    | TP1 vs TP3     | 0.00 <sup>a</sup>  | 0.5                 |
|                                  |    | TP2 vs TP3     | 0.20 <sup>a</sup>  | 0.1                 |
| Tail defects                     | 36 | TP1 vs TP2     | 0.28 <sup>a</sup>  | 0.2                 |
|                                  |    | TP1 vs TP3     | 0.08 <sup>a</sup>  | 0.3                 |
|                                  |    | TP2 vs TP3     | 0.30 <sup>a</sup>  | 0.1                 |
| Alcohol consumption              | 36 | TP1 vs TP2     | 0.00 <sup>a</sup>  | 1.1                 |
|                                  |    | TP1 vs TP3     | 0.48 <sup>a</sup>  | 0.1                 |
|                                  |    | TP2 vs TP3     | 0.00 <sup>a</sup>  | 1.1                 |
| Nicotine consumption             | 36 | TP1 vs TP2     | 0.00 <sup>a</sup>  | 0.3                 |
|                                  |    | TP1 vs TP3     | 0.21 <sup>a</sup>  | 0.1                 |
|                                  |    | TP2 vs TP3     | 0.08 <sup>a</sup>  | 0.2                 |
| Total antioxidant capacity (TAS) | 22 | TP1 vs TP2     | 0.07 <sup>b</sup>  | 0.3                 |
|                                  |    | TP1 vs TP3     | 0.21 <sup>a</sup>  | 0.3                 |
|                                  |    | TP2 vs TP3     | 1.00 <sup>b</sup>  | 0.1                 |
| 3- Nitrotyrosine (3-NT)          | 24 | TP1 vs TP2     | 0.24 <sup>b</sup>  | 0.2                 |
|                                  |    | TP1 vs TP3     | 0.08 <sup>b</sup>  | 0.1                 |
|                                  |    | TP2 vs TP3     | 0.01 <sup>b</sup>  | 0.3                 |
| Superoxide dismutase 1 (SOD1)    | 23 | TP1 vs TP2     | 0.68 <sup>c</sup>  | 0.1                 |
|                                  |    | TP1 vs TP3     | 0.68 <sup>c</sup>  | 0.4                 |
|                                  |    | TP2 vs TP3     | 1.00 <sup>c</sup>  | 0.4                 |
| Glutathione peroxidase 4 (GPx4)  | 20 | TP1 vs TP2     | 0.41 <sup>c</sup>  | 0.2                 |
|                                  |    | TP1 vs TP3     | 0.84 <sup>c</sup>  | 0.0                 |
|                                  |    | TP2 vs TP3     | 0.84 <sup>c</sup>  | 0.2                 |
| Carbonyl groups (CG)             | 12 | TP1 vs TP2     | 0.39 <sup>a</sup>  | 0.1                 |
|                                  |    | TP1 vs TP3     | 0.41 <sup>a</sup>  | 0.3                 |

|                          |    |            |                   |     |
|--------------------------|----|------------|-------------------|-----|
|                          |    | TP2 vs TP3 | 1.00 <sup>c</sup> | 0.5 |
| Citric acid              | 12 | TP1 vs TP2 | 0.21 <sup>b</sup> | 0.2 |
|                          |    | TP1 vs TP3 | 0.03 <sup>a</sup> | 1.0 |
|                          |    | TP2 vs TP3 | 0.77 <sup>c</sup> | 0.5 |
|                          |    |            |                   |     |
| Fructose                 | 12 | TP1 vs TP2 | 0.76 <sup>a</sup> | 0.1 |
|                          |    | TP1 vs TP3 | 0.02 <sup>a</sup> | 0.5 |
|                          |    | TP2 vs TP3 | 0.04 <sup>a</sup> | 0.4 |
| Neutral alfa-glucosidase | 12 | TP1 vs TP2 | 0.28 <sup>a</sup> | 0.2 |
|                          |    | TP1 vs TP3 | 0.02 <sup>a</sup> | 0.7 |
|                          |    | TP2 vs TP3 | 0.04 <sup>c</sup> | 0.5 |

a. T-test; b. Wilcoxon Signed Ranks test (asympt. sig.); c. Sign test (exact sig.) - Binomial distribution used.
